# Supplementary material
Source: Frontiers journal article supplement (https://www.frontiersin.org/articles/352863)
Supplement: Image_5.pdf [file Image_5.pdf]

## PART V

The figures below show the estimate of the person-specific (pink) and the conditional (blue) SEM (y-axis) compared to the true square root of the error variances (x-axis), after respectively 1, 2, 3, 4, 5, 10, 25 and 50 test takes. At the right side of the plot, the Pearson correlation between the true and estimated SEM is shown, for the person-specific ( $r_{ps}$ ) and the conditional ( $r_c$ ) SEM separately. Each figure shows the results for a 12-item test with  $K = 2$ . Additionally, a table is added showing the between standard deviation over all SEM estimates and the within standard deviation over all SEM estimates for true SEM .6. The figures and tables are shown separately for the case with continuous parallel test scores and rounded and truncated parallel test scores.

## 12 items, $K = 2$ , continuous parallel test scores

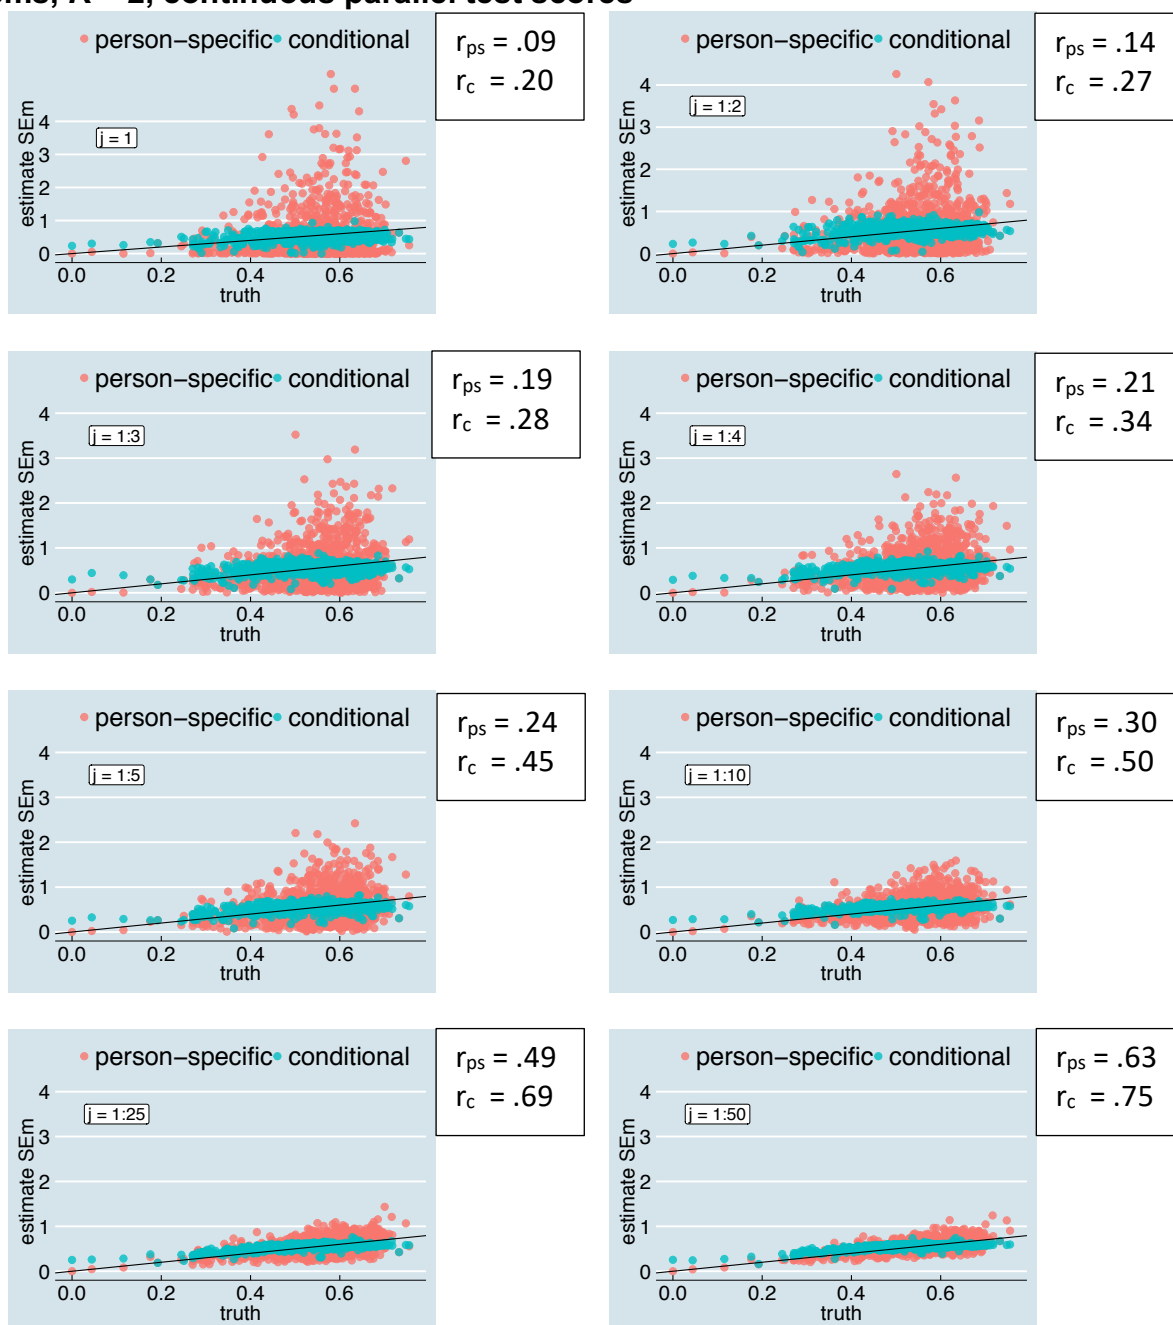

Within standard deviation for truth = .6 vs between standard deviation

| $J$                 | 1   | 2   | 3   | 4   | 5   | 10  | 25  | 50  |
|---------------------|-----|-----|-----|-----|-----|-----|-----|-----|
| Person-specific SEm |     |     |     |     |     |     |     |     |
| within              | .69 | .57 | .44 | .42 | .37 | .26 | .17 | .12 |
| between             | .74 | .60 | .49 | .41 | .37 | .26 | .18 | .15 |
| Conditional SEm     |     |     |     |     |     |     |     |     |
| within              | .10 | .07 | .06 | .05 | .05 | .03 | .03 | .03 |
| between             | .12 | .11 | .10 | .09 | .09 | .06 | .06 | .05 |

## 12 items, $K = 2$ , truncated and rounded parallel test scores

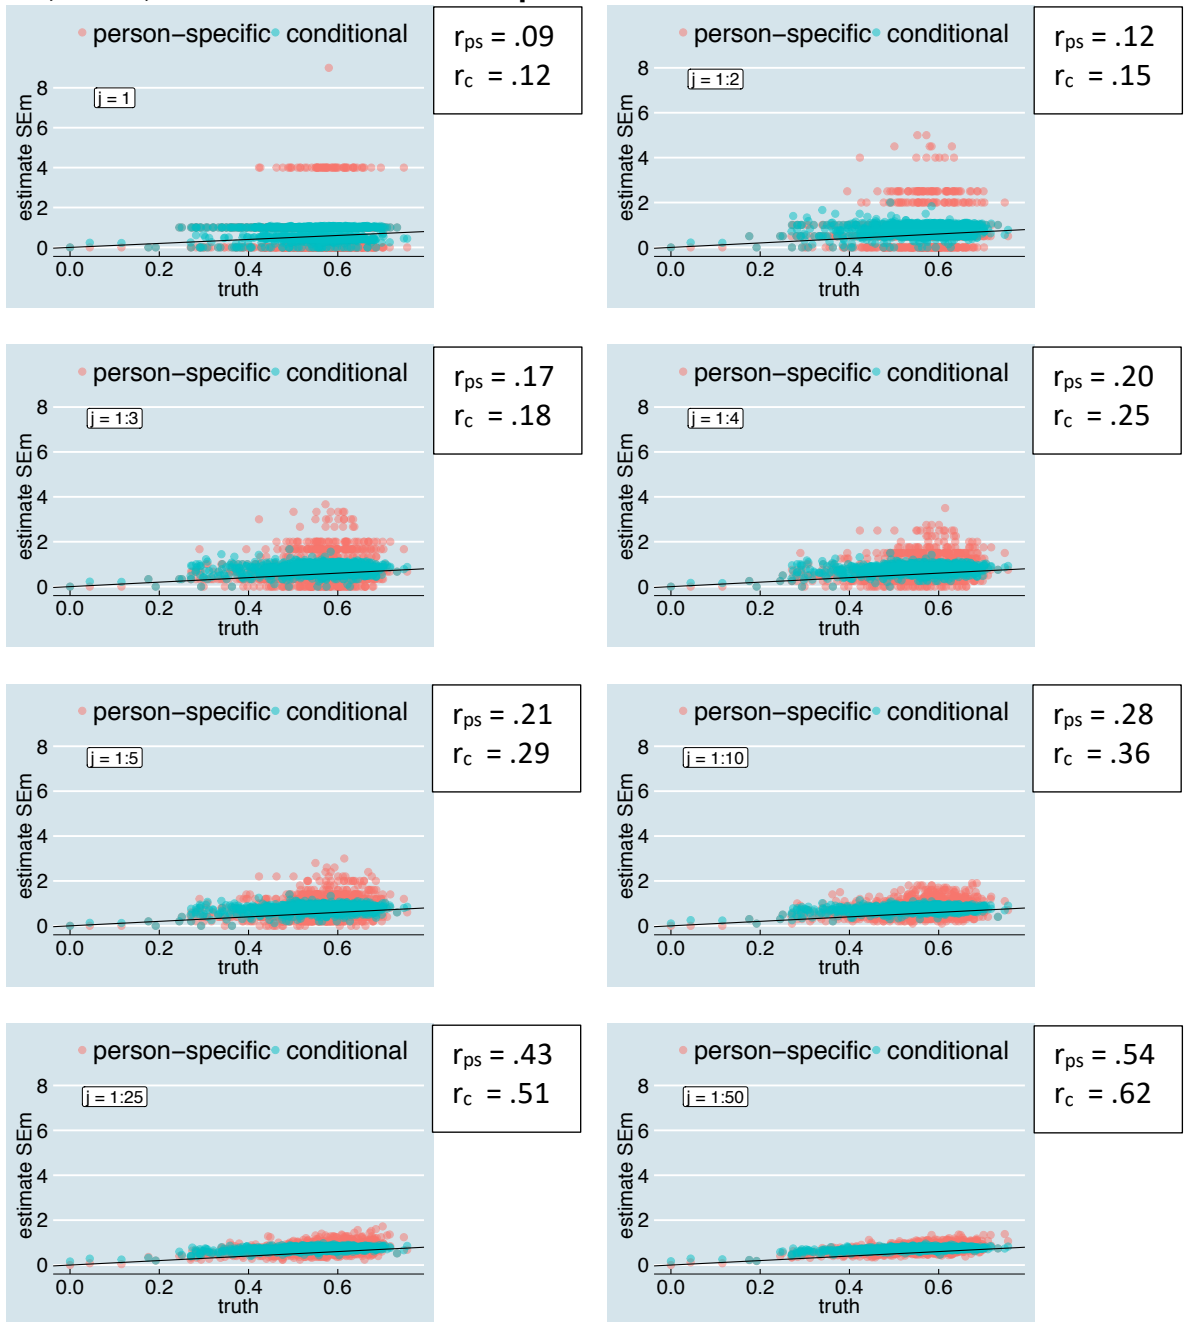

Within standard deviation for truth = .6 vs between standard deviation

| $J$                 | 1   | 2   | 3   | 4   | 5   | 10  | 25  | 50  |
|---------------------|-----|-----|-----|-----|-----|-----|-----|-----|
| Person-specific SEm |     |     |     |     |     |     |     |     |
| within              | .50 | .39 | .31 | .23 | .27 | .29 | .18 | .14 |
| between             | .98 | .76 | .62 | .52 | .47 | .34 | .23 | .18 |
| Conditional SEm     |     |     |     |     |     |     |     |     |
| within              | .37 | .29 | .20 | .17 | .15 | .13 | .07 | .05 |
| between             | .33 | .25 | .21 | .19 | .17 | .12 | .09 | .07 |
