# Supplementary material
Source: Frontiers journal article supplement (https://www.frontiersin.org/articles/352863)
Supplement: Image_6.pdf [file Image_6.pdf]

## PART VI

The figures below show the Pearson correlation between true and estimated SEM for different numbers of test takes (x-axis) and different test lengths (colors) when the parallel test scores are rounded and truncated. The upper figure shows the Pearson correlations for the person-specific SEM and the lower figure the Pearson correlations for the conditional SEM.

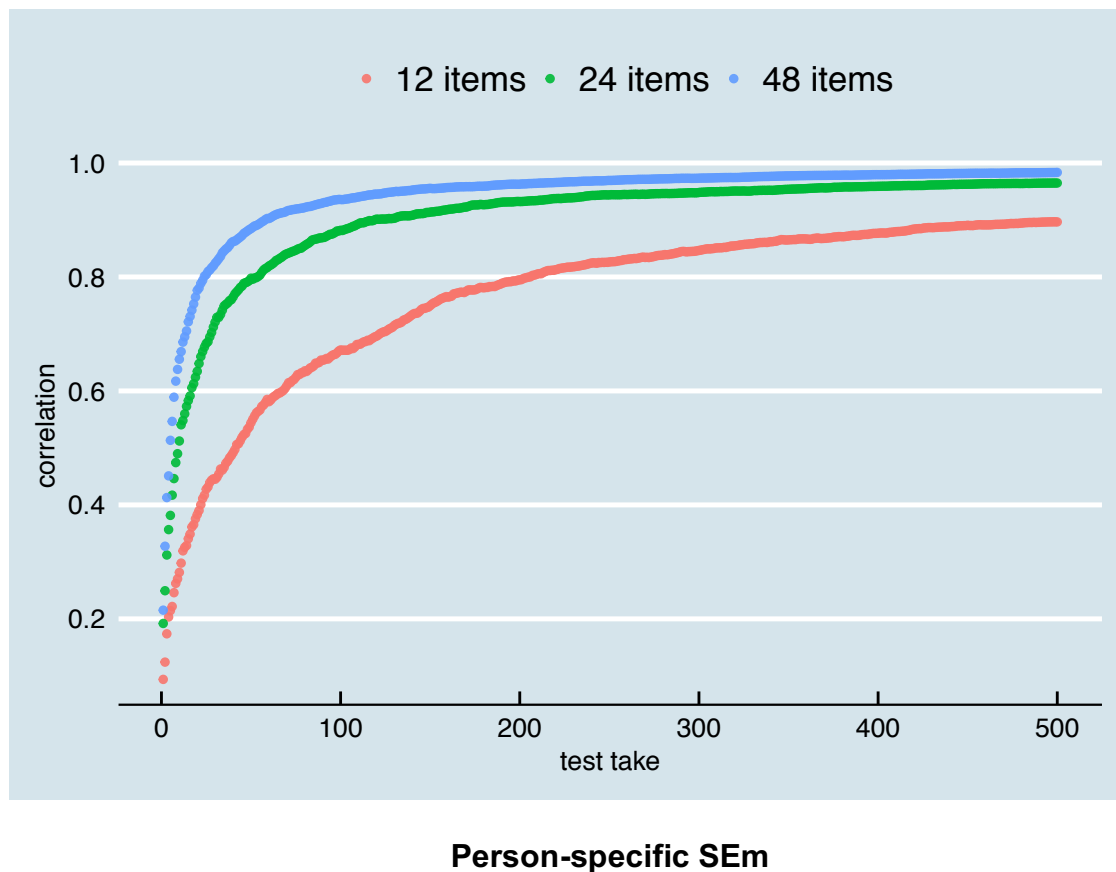

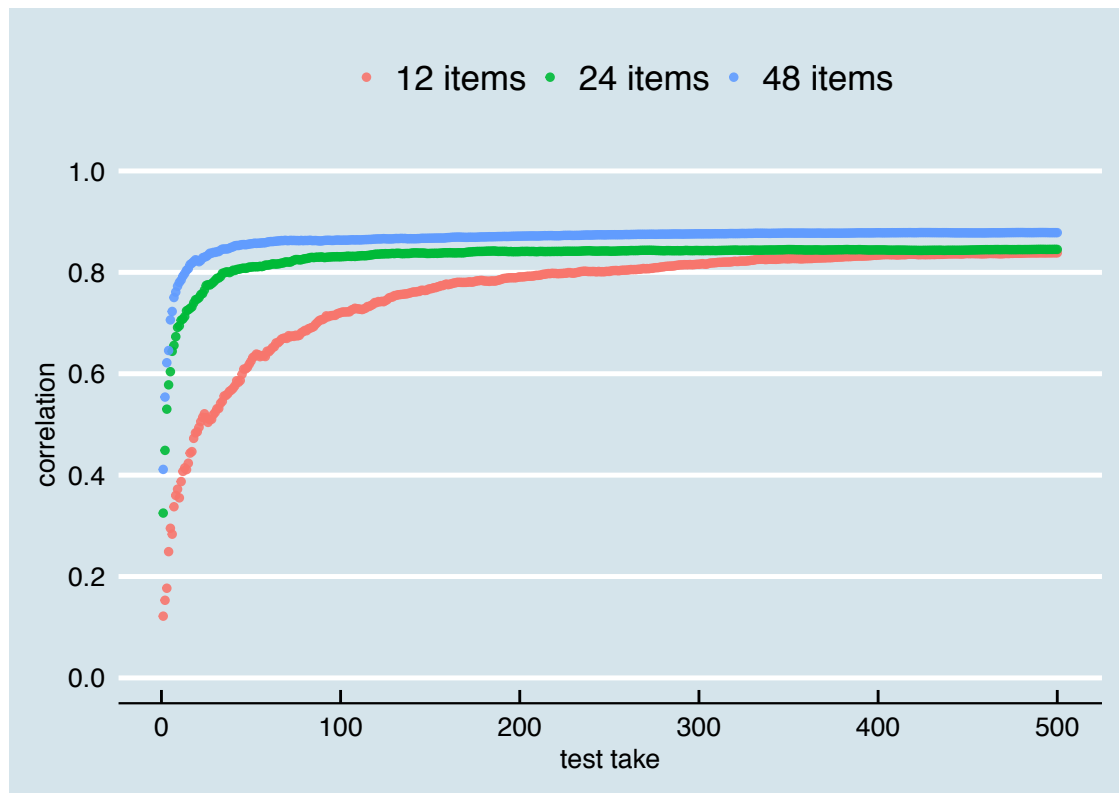

**Conditional SEM**
